# Supplementary material
Source: PubMed Central journal article supplement (PMC2546510)
Supplement: NIHMS62699-supplement-1File002.pdf [file NIHMS62699-supplement-1File002.pdf]

Supplementary material for:

## Covalent Immobilization of P-selectin Enhances Cell Rolling

*Seungpyo Hong<sup>1</sup>, Dooyoung Lee<sup>2</sup>, Huanan Zhang<sup>1</sup>, Jennifer Q. Zhang<sup>1</sup>,  
Jennifer N. Resvick<sup>1</sup>, Ali Khademhosseini<sup>3,5</sup>, Michael R. King<sup>2,4</sup>, Robert Langer<sup>1,3</sup>,  
Jeffrey M. Karp<sup>3,5,†</sup>*

<sup>1</sup>Department of Chemical Engineering and <sup>3</sup>Harvard-MIT Division of Health Sciences,  
Massachusetts Institute of Technology, Cambridge, MA 02139

Departments of <sup>2</sup>Chemical Engineering and <sup>4</sup>Biomedical Engineering, University of  
Rochester, Rochester, NY 14627

<sup>5</sup>Center for Biomedical Engineering, Department of Medicine, Brigham and Women's  
Hospital, Harvard Medical School, Cambridge, MA 02139

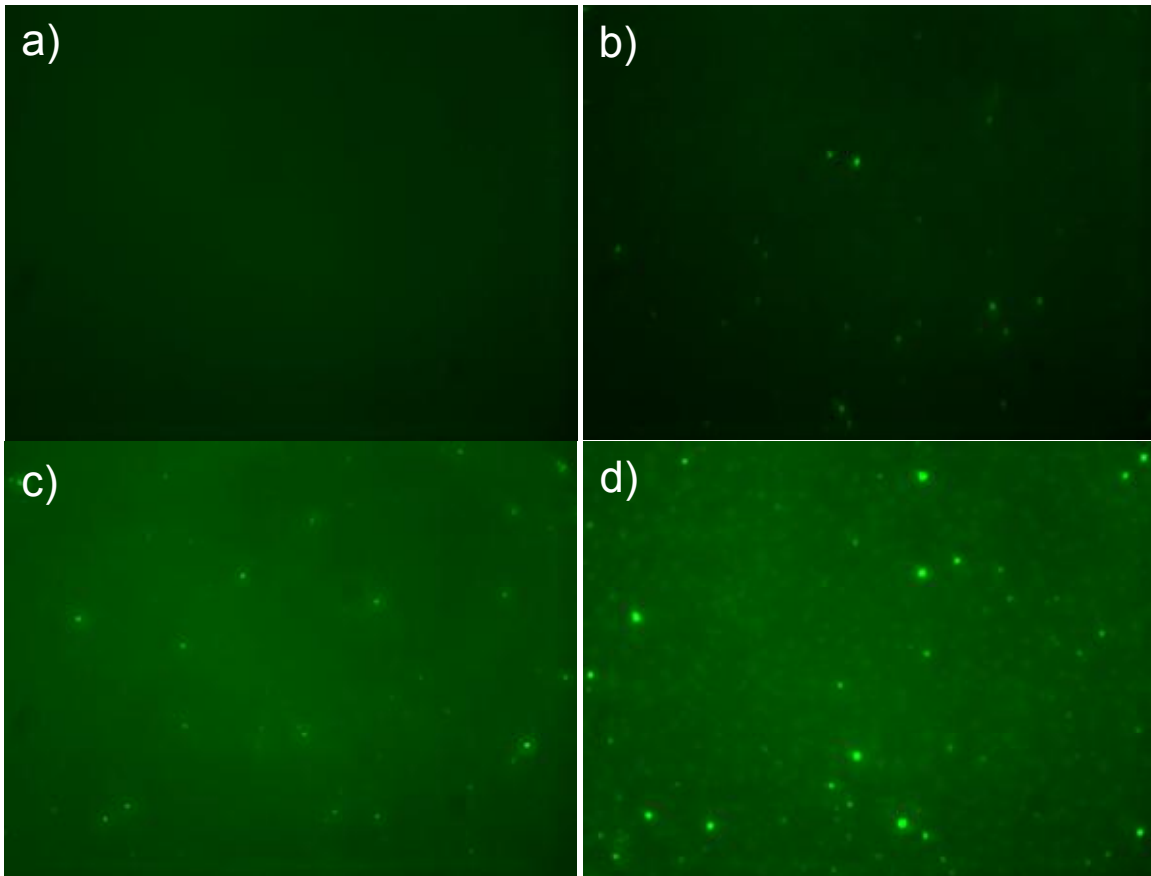

**Supplementary Figure 1.** Fluorescence microscopy of P-selectin antibody-FITC conjugate incubated on a) untreated amine glass and amine glass substrates with b) 5  $\mu\text{g}$ , c) 10  $\mu\text{g}$ , and d) 20  $\mu\text{g}$  of P-selectin. P-selectin was immobilized onto the amine glass overnight after pre-activation with EDC and NHS. The antibody-FITC conjugate was incubated for 2 hours. Note that significant aggregation of P-selectin was observed in this chemistry. The images were taken using a 10x objective.

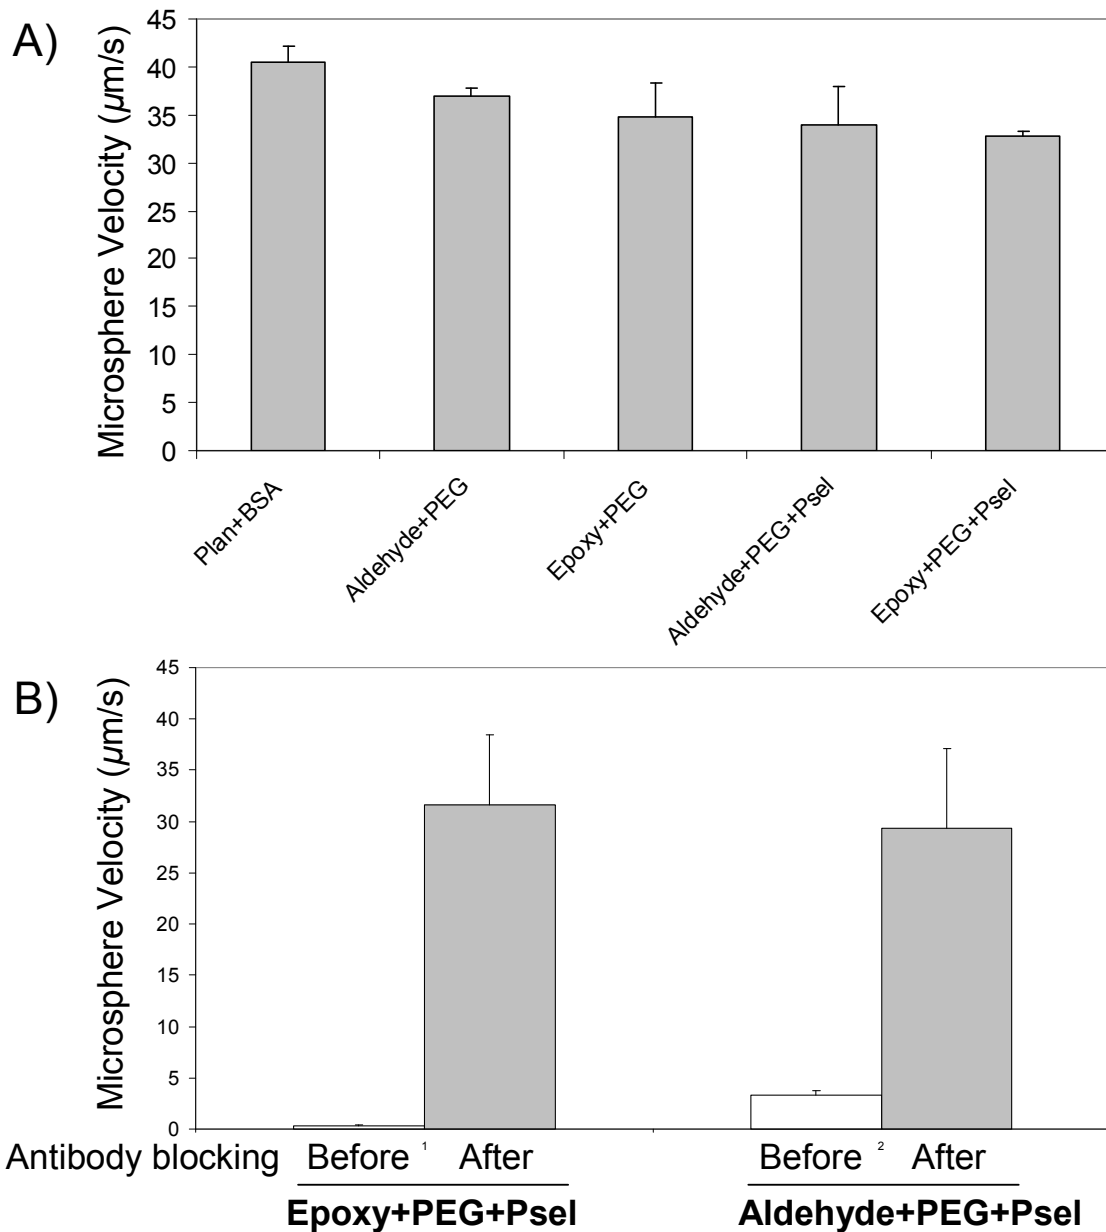

**Supplementary Figure 2.** Confirmation of specific interaction between P-selectin and surface bound ligand (sLe<sup>x</sup>) on microspheres. (A) Measured velocities of native microspheres (without sLe<sup>x</sup>) on control and experimental surfaces. Note that the velocities were not significantly different, indicating that there is minimal non-specific interaction between substrates and microspheres. (B) Comparison of velocities of microsphere-sLe<sup>x</sup> conjugates on P-selectin immobilized substrates before and after treatment with an antibody for P-selectin. Velocities significantly increased when substrates were preincubated with antibody indicating that the reduced velocities observed in experimental groups were due to a direct interaction of P-selectin with the sLe<sup>x</sup>.

**Supplementary Table 1.** Statistical analysis (P values) for the comparison between samples examined 3 days and 28 after preparation.

| Wall shear stress<br>(dyn/cm <sup>2</sup> ) | Plain glass slide | PEGylated epoxy<br>glass slide<br>(inactivated) | PEGylated epoxy<br>glass slide<br>(activated) |
|---------------------------------------------|-------------------|-------------------------------------------------|-----------------------------------------------|
| 1                                           | 0.155             | 0.041                                           | 0.161                                         |
| 3                                           | 0.082             | 0.002                                           | 0.212                                         |
| 5                                           | 0.011             | 0.010                                           | 0.017                                         |
| 10                                          | 0.011             | 0.008                                           | 0.004                                         |
